# Supplementary material
Source: publisher site journal article supplement (https://www.dovepress.com/article/494899)
Supplement: Supplementary file 1 [file get_supplementary_file.php]

**Supplementary Table 1: Patient and Tumor Characteristics by Neutrophil lymphocyte ratio**

| **Variable** | **Categories** | **NLR Categories** | | |  | ***P*-value** |
| --- | --- | --- | --- | --- | --- | --- |
| **<0.7**  **n=2** | **0.7-3**  **n=97** | **>3**  **n=35** | **Total**  **n=134** |
| **Age** |  | 13.50±0.71 | 16.86±7.69 | 17.20±5.77 | 16.90±7.17 | 0.776 |
| **Size (cm)** |  |  | 10.32±6.32 | 11.32±6.24 | 10.42±6.38 | 0.220 |
| **IDO Category** | Negative | 2(100.0%) | 89(91.8%) | 34(97.1%) | 125(93.3%) | 0.586 |
| Low |  | 5(5.2%) | 1(2.9%) | 6(4.5%) |
| High |  | 3(3.1%) |  | 3(2.2%) |
| **Diagnosis** | Osteosarcoma | 1(50.0%) | 82(84.5%) | 32(91.4%) | 115(85.8%) | 0.135 |
| Chondroblastic Osteosarcoma | 1(50.0%) | 13(13.4%) | 1(2.9%) | 15(11.2%) |
| Small Cell Osteosarcoma |  |  | 1(2.9%) | 1(0.7%) |
| Telangiectatic Osteosarcoma |  | 1(1.0%) | 1(2.9%) | 2(1.5%) |
| Parosteal Osteosarcoma |  | 1(1.0%) |  | 1(0.7%) |
| **Laterality** | NA |  | 2(2.1%) | 1(2.9%) | 3(2.2%) | 0.881 |
| Right | 1(50.0%) | 50(51.5%) | 21(60.0%) | 72(53.7%) |
| Left | 1(50.0%) | 45(46.4%) | 13(37.1%) | 59(44.0%) |
| **Necrosis Grade**  **(post-chemo)** | Unknown | 1(50.0%) | 12(12.4%) | 5(14.3%) | 18(13.4%) | 0.649 |
| 1.00 |  | 9(9.3%) | 4(11.4%) | 13(9.7%) |
| 2.00 | 1(50.0%) | 58(59.8%) | 16(45.7%) | 75(56.0%) |
| 3.00 |  | 17(17.5%) | 10(28.6%) | 27(20.1%) |
| 4.00 |  | 1(1.0%) |  | 1(0.7%) |
| **Lymph-vascular Invasion** | Unknown | 2(100.0%) | 50(51.5%) | 13(37.1%) | 65(48.5%) | 0.224 |
| No |  | 46(47.4%) | 21(60.0%) | 67(50.0%) |
| Present |  | 1(1.0%) | 1(2.9%) | 2(1.5%) |
| **T-Stage** | pT0 |  | 2(2.1%) |  | 2(1.5%) | **0.003*** |
| pT1 |  | 31(32.0%) | 6(17.1%) | 37(27.6%) |
| pT2 |  | 60(61.9%) | 28(80.0%) | 88(65.7%) |
| Unknown | 2(100.0%) | 4(4.1%) | 1(2.9%) | 7(5.2%) |
| **Status** | Unknown |  | 25(25.8%) | 8(22.9%) | 33(24.6%) | 0.559 |
| Dead | 2(100.0%) | 40(41.2%) | 14(40.0%) | 56(41.8%) |
| Alive |  | 32(33.0%) | 13(37.1%) | 45(33.6%) |

*P-value is less than 0.05.
